# Supplementary material
Source: Research Square preprint supplement (doi:10.21203/rs.3.rs-8981614/v1)
Supplement: Supplementary file 1 [file c2b5b5f319641a7fdfd5ecf0.docx]

**Structural Evolution and Sorption Performance of Fly Ash-Based Geopolymers for Trivalent Actinide Sequestration**

Atanu Das 1, Aishwarya S. Kar 1,2*, Vaishali Arunachalam 3, Deepak Tyagi 2,4, R. T. Parayil2,5

*1 Radioanalytical Chemistry Division, Bhabha Atomic Research Centre, Mumbai – 400085*

*2 Homi Bhabha National Institute, Anushaktinagar, Mumbai- 400094*

*3Tata Institute of Fundamental Research, Hyderabad – 500046*

*4Chemistry Division, Bhabha Atomic Research Centre, Trombay, Mumbai – 400085*

*5Radiochemistry Division, Bhabha Atomic Research Centre, Trombay, Mumbai - 400085*

**Email: aishj@barc.gov.in*



TGA curve of sodium metasilicate recorded from 25 °C to 800 °C at a heating rate of 10 °C/min under nitrogen atmosphere. A prominent weight loss (58.27%) is observed between 30 °C and 120 °C corresponding to the evaporation of physically adsorbed moisture and crystalline water. Form the TGA the effective molecular formula is found to be Na2SiO3.9H2O and Na2O and Si2O mole ratio is 1:1.

SI Fig.1: TGA of sodium metasilicate

SI Table 1 summarizes Si/Al, H2O/Na2O, Na2SiO3/NaOH and S/L ratio for all synthesized geopolymers. For all the activator solutions the H2O/Na2O was maintained at 15 and Na2SiO3 ratio was varied from 1.5 to 3.5 and the solid to liquid ratio was maintained at 1 for each geopolymer synthesis.

SI Table 1: Formulations of activator solutions used for GP synthesis

| Sorbent | Si/Al (wt) | s/l | H2O/Na2O (wt) | Na2SiO3/NaOH |
| --- | --- | --- | --- | --- |
| FA | 2.17 | - | - | - |
| FA + AS 2 | 1 | 15 | 1.5 |
| FA + AS 3 | 1.75 |
| FA + AS 4 | 2 |
| FA + AS 5 | 2.25 |
| FA + AS 6 | 2.5 |
| FA + AS 7 | 2.75 |
| FA + AS 8 | 3 |
| FA + Al2O3 + AS 6 | 1.81 | 3.5 |
| Al2O3 | - | - | - | - |





**(a)**





**(b)**





**(c)**

SI Fig.2: Fitting of SI Fig. 2 :27Al MAS NMR spectra a) FA b) FA-GP c) FA-Al-GP

SI Fig. 3 shows the sorption efficiency of various geopolymers for Am (III) at a concentration of 1x10-5 M with sorbent dose of 1 g.L‑1.The FA + AS 6 (FA-GP) along with FA + Al2O3 + AS 6 (FA-GP-Al2O3) and Al2O3 synthesized form Al foil, exhibited the highest sorption capacity of 98%, indicating strong uptake, whereas the plain fly ash (FA) showed significantly lower sorption (10%).





SI Fig. 3: Sorption capacity of all synthesized geopolymers with sorbent dose of 1g.L-1 and [Am(III)] = 10-5 M


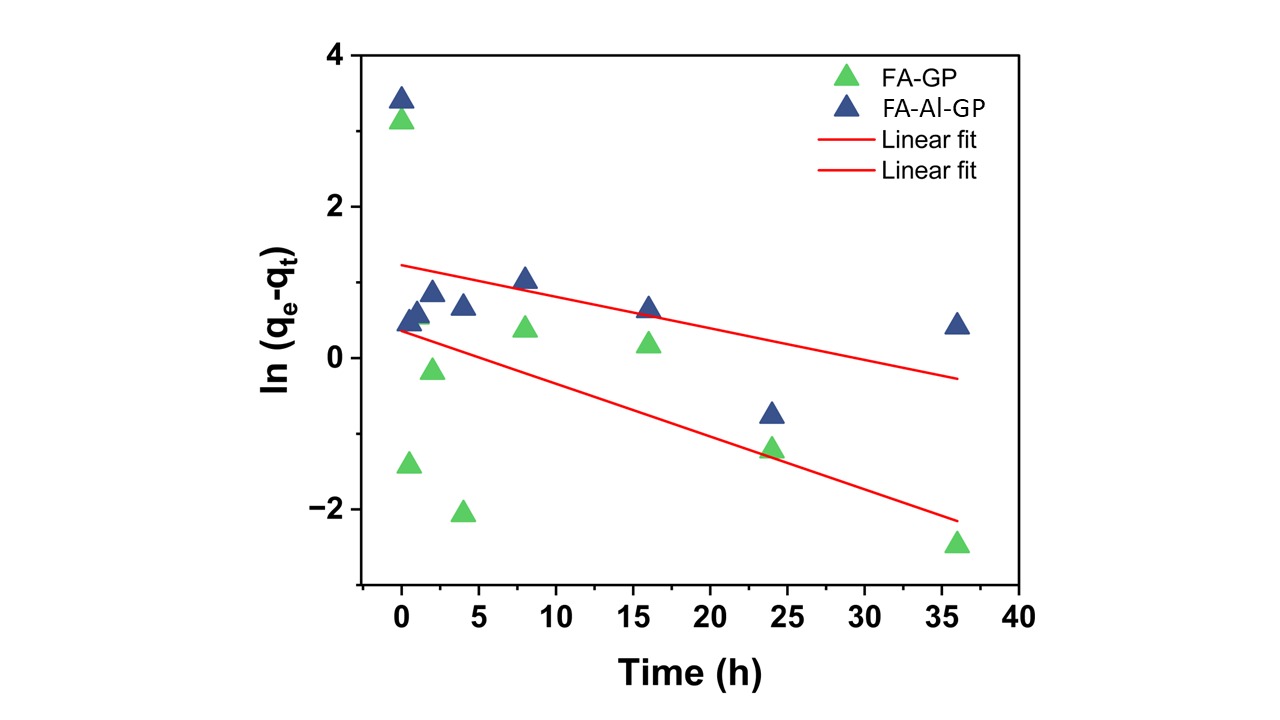


SI Fig. 4:PFO fit of sorption kinetics of Am(III)/Eu(III) on FA-GP and FA-Al-GP with sorbent dose of 1g.L-1 and [Am(III)] /Eu(III)]= 5x10-4 M















SI Fig. 5: Langmuir, Freundlich, Temkin, D-R and Sips isotherm fit with Van’t Hoff fit for FA-GP with sorbent dose 1 gL-1at 298K, 313K and 328K at pH 6

f

d

c

b

a















SI Fig. 6: Langmuir, Freundlich, Temkin, D-R and Sips isotherm fit with Van’t Hoff fit for FA-Al-GP with sorbent dose 1 g L-1at 298K, 313K and 328K at pH 6

*SI Table 2. XPS binding energies (eV) of O 1s and Eu 4d regions for FA-GP and FA-Al-GP before and after Eu(III) sorption.*

| Region | Binding Energy (eV) | | | |
| --- | --- | --- | --- | --- |
| FA-GP | | FA-GP-Al2O3 | |
| Blank | Eu (III) incorporated | Blank | Eu (III) incorporated |
| O1s | 530.0, 531.18 | 530.23, 527.18 | 530.26, 531.4 | 530.15, 530.446 |
| Eu 4d |  | 141.101, 135.63 |  | 140.929, 135.529 |
